# Supplementary material
Source: PubMed Central journal article supplement (PMC9507982)
Supplement: mmc1.pdf [file mmc1.pdf]

**Supplemental material****Table s1.** Neuropsychological test and questionnaire outcomes in patients with and without cognitive impairments or cognitive complaints

|                                       | <b>Objective cognition</b>   |                            |                   | <b>Subjective cognition</b>  |                            |                   |
|---------------------------------------|------------------------------|----------------------------|-------------------|------------------------------|----------------------------|-------------------|
|                                       | <b>Unimpaired<br/>(n=70)</b> | <b>Impaired<br/>(n=26)</b> | <b>p-value</b>    | <b>Unimpaired<br/>(n=74)</b> | <b>Impaired<br/>(n=18)</b> | <b>p-value</b>    |
| <b>Neuropsychological tests</b>       |                              |                            |                   |                              |                            |                   |
| MoCA raw score, median [IQR]          | 26 [25-28]                   | 24 [22-26]                 | <b>p&lt;0.001</b> | 26 [25-28]                   | 26 [25-26]                 | p=0.44            |
| MoCA T-score, mean (SD)               | 52.5 (7.8)                   | 45.2 (10.3)                | <b>p=0.001</b>    | 51.4 (9.7)                   | 48.3 (6.0)                 | p=0.192           |
| TMT-A T- score, mean (SD)             | 51.3 (11.1)                  | 39.3 (17.6)                | <b>p=0.003</b>    | 48.8 (13.4)                  | 45.9 (14.7)                | p=0.42            |
| TMT-B T-score, mean (SD)              | 50.3 (8.8)                   | 29.1 (8.8)                 | <b>p&lt;0.001</b> | 45.9 (11.7)                  | 47.0 (9.1)                 | p=0.71            |
| TMT-B/A T- score, mean (SD)           | 49.7 (9.3)                   | 31.8 (11.1)                | <b>p&lt;0.001</b> | 45.5 (12.2)                  | 49.0 (9.4)                 | p=0.26            |
| Digit Span T- score, mean (SD)        | 49.1 (9.5)                   | 39.4 (11.4)                | <b>p=0.003</b>    | 47.3 (11.0)                  | 45.9 (9.5)                 | p=0.64            |
| LDST T-score, mean (SD)               | 48.0 (10.0)                  | 37.0 (10.4)                | <b>p&lt;0.001</b> | 45.4 (10.9)                  | 45.5 (12.5)                | p=0.97            |
| Overall T-score, mean (SD)            | 50.1 (5.1)                   | 38.5 (6.5)                 | <b>p&lt;0.001</b> | 47.4 (7.4)                   | 46.8 (6.7)                 | p=0.77            |
| <b>Weighted test results</b>          |                              |                            |                   |                              |                            |                   |
| MoCA, n (%)                           |                              |                            |                   |                              |                            |                   |
| - Unimpaired                          | 66 (94.3)                    | 19 (73.1)                  | <b>p=0.001</b>    | 66 (89.2)                    | 17 (94.4)                  | p=0.60            |
| - Below average                       | 4 (5.7)                      | 2 (7.7)                    |                   | 4 (5.4)                      | 1 (5.6)                    |                   |
| - Impaired                            | 0 (0.0)                      | 5 (19.2)                   |                   | 4 (5.4)                      | 0 (0.0)                    |                   |
| TMT-A, n (%)                          |                              |                            |                   |                              |                            |                   |
| - Unimpaired                          | 54 (77.1)                    | 13 (50.0)                  | <b>p=0.001</b>    | 54 (73.0)                    | 10 (55.6)                  | p=0.34            |
| - Below average                       | 12 (17.1)                    | 3 (11.5)                   |                   | 11 (14.9)                    | 4 (22.2)                   |                   |
| - Impaired                            | 4 (5.7)                      | 10 (38.5)                  |                   | 9 (12.1)                     | 4 (22.2)                   |                   |
| TMT-B, n (%)                          |                              |                            |                   |                              |                            |                   |
| - Unimpaired                          | 63 (90.0)                    | 3 (11.5)                   | <b>p&lt;0.001</b> | 48 (69.6)                    | 15 (83.3)                  | p=0.51            |
| - Below average                       | 5 (7.1)                      | 3 (11.5)                   |                   | 7 (10.1)                     | 1 (5.6)                    |                   |
| - Impaired                            | 2 (2.9)                      | 20 (76.9)                  |                   | 14 (20.3)                    | 2 (11.1)                   |                   |
| TMT-B/A, n (%)                        |                              |                            |                   |                              |                            |                   |
| - Unimpaired                          | 59 (84.3)                    | 5 (19.2)                   | <b>p&lt;0.001</b> | 48 (69.6)                    | 14 (77.8)                  | p=0.66            |
| - Below average                       | 8 (11.4)                     | 4 (15.4)                   |                   | 7 (10.1)                     | 4 (22.2)                   |                   |
| - Impaired                            | 3 (4.3)                      | 17 (65.4)                  |                   | 14 (20.3)                    | 0 (0.0)                    |                   |
| Digit Span, n (%)                     |                              |                            |                   |                              |                            |                   |
| - Unimpaired                          | 57 (81.4)                    | 11 (42.3)                  | <b>p&lt;0.001</b> | 54 (73.0)                    | 13 (72.2)                  | p=0.99            |
| - Below average                       | 9 (12.9)                     | 2 (7.7)                    |                   | 8 (10.8)                     | 2 (11.1)                   |                   |
| - Impaired                            | 4 (5.7)                      | 13 (50.0)                  |                   | 12 (16.2)                    | 3 (16.7)                   |                   |
| LDST, n (%)                           |                              |                            |                   |                              |                            |                   |
| - Unimpaired                          | 56 (80.0)                    | 9 (34.6)                   | <b>p&lt;0.001</b> | 50 (67.6)                    | 14 (77.8)                  | p=0.30            |
| - Below average                       | 5 (7.1)                      | 4 (15.4)                   |                   | 9 (12.2)                     | 0 (0.0)                    |                   |
| - Impaired                            | 9 (12.9)                     | 13 (50.0)                  |                   | 15 (20.3)                    | 4 (22.2)                   |                   |
| <b>Self-reporting Questionnaires</b>  |                              |                            |                   |                              |                            |                   |
| CFQ total, mean (SD)                  | 32.7 (15.6)                  | 33.8 (14.5)                | p=0.76            | 27.3 (10.8)                  | 56.6 (8.8)                 | <b>p&lt;0.001</b> |
| Clinical Frailty Scale, median [IQR]  | 3 [2-4]                      | 4 [3-4]                    | p=0.12            | 3 [2-4]                      | 4 [3-4]                    | p=0.18            |
| HADS total, median [IQR]              | 7 [4-15]                     | 9 [5-17]                   | p=0.24            | 7 [4-14]                     | 15 [8-21]                  | <b>p=0.002</b>    |
| HADS anxiety, median [IQR]            | 4 [2-8]                      | 4 [3-10]                   | p=0.27            | 3 [2-6]                      | 8 [6-11]                   | <b>p&lt;0.001</b> |
| HADS depression, median [IQR]         | 3 [2-7]                      | 5 [3-7]                    | p=0.12            | 3 [2-7]                      | 5 [3-12]                   | p=0.090           |
| SF-12 physical T-score, median [IQR]  | 38.0 [30.6-48.1]             | 37.7 [31.6-41.7]           | p=0.76            | 39.3 [32.1-48.1]             | 32.9 [23.0-39.4]           | <b>p=0.026</b>    |
| SF-12 mental T-score, median [IQR]    | 52.7 [43.6-57.9]             | 54.9 [40.6-56.6]           | p=0.29            | 53.8 [46.5-59.1]             | 43.0 [37.8-51.3]           | <b>p=0.004</b>    |
| BSI (GSI) T-score, median [IQR]       | 48.0 [36.4-59.8]             | 54.9 [39.9-62.0]           | p=0.13            | 47.1 [36.4-56.8]             | 63.7 [58.2-68.9]           | <b>p&lt;0.001</b> |
| <b>Dichotomized cognitive outcome</b> |                              |                            |                   |                              |                            |                   |
| Objective cognitive impairment, n(%)  | 0 (0.0)                      | 24 (100.0)                 | NA                | 21 (28.4)                    | 3 (16.7)                   | p=0.31            |
| Subjective cognitive impairment, n(%) | 15 (22.1)                    | 3 (12.5)                   | p=0.31            | 0 (0.0)                      | 18 (100.0)                 | NA                |

**Abbreviations:** MoCA, Montreal Cognitive Assessment; TMT, Trail Making Test; Digit Span, Wechsler Adult Intelligence Scale-IV Digit Span test; LDST, Letter Digit Substitution Test. CFQ, Cognitive Failure Questionnaire; HADS, Hospital Anxiety and Depression Scale; SF-12, Short Form Health Survey-12; BSI, Brief Symptom Inventory; GSI, Global Severity Index. All individual test results were corrected for age, education, and sex using normative data of normal Dutch control population.

**Weighted test results:** *unimpaired:* T-score >40 (> -1 SD); *below average:* T-score 35-40 (-1.5 to -1 SD); *impaired:* T-score <40 (< -1.5 SD). **Dichotomization:** Patients were categorized as *objectively* cognitively impaired if they had a weighted score of *impaired* at two or more tests. Patients were categorized as *subjectively* cognitively impaired when CFQ scores were 44 or higher.
